# Supplementary material for: Effect of layers on the photocatalytic hydrogen evolution in Dion–Jacobson layered-tantalum perovskites
Source: Royal Society of Chemistry journal article supplement (doi:10.1039/d1dt02069b), 2021-01-01
Supplement: d1dt02069b1.pdf [file d1dt02069b1.pdf]

*Supporting Information (SI)*

# Effect of Layers on the Photocatalytic Hydrogen Evolution in Dion-Jacobson Layered-Tantalum Perovskites

Peng Wang<sup>a,b,#</sup>, Wenqian Chen<sup>a,b,#,\*</sup>, Zihan Wang<sup>a,b</sup>, Ya Tang<sup>c,\*</sup>, Wenyan Shi<sup>a,b</sup>, Liang Tang<sup>a,b\*</sup>

- a. Key Laboratory of Organic Compound Pollution Control Engineering, Ministry of Education, Shanghai 200444, PR China.
- b. School of Environmental and Chemical Engineering, Shanghai University, Shanghai 200444, PR China.
- c. Department of Chemistry, School of Science, Shanghai University, No. 99, Shangda Roda, Baoshan District, Shanghai, China

Correspondence and requests for materials should be addressed to Wenqian Chen (email: [wenqianchen@shu.edu.cn](mailto:wenqianchen@shu.edu.cn), [tangya0709@shu.edu.cn](mailto:tangya0709@shu.edu.cn), [tang1liang@shu.edu.cn](mailto:tang1liang@shu.edu.cn)).

**Table S1.** Atomic composition of all samples was determined by SEM-EDS.

| Samples                                          | Atomic ratios |             |             |
|--------------------------------------------------|---------------|-------------|-------------|
|                                                  | K/Ta          | La/Ta       | Ca/Ta       |
| LaTaO <sub>4</sub>                               | -             | 0.98(±0.05) | -           |
| KLaTa <sub>2</sub> O <sub>7</sub>                | 0.43(±0.01)   | 0.59(±0.05) | -           |
| KCa <sub>2</sub> Ta <sub>3</sub> O <sub>10</sub> | 0.34(±0.01)   | -           | 0.67(±0.04) |

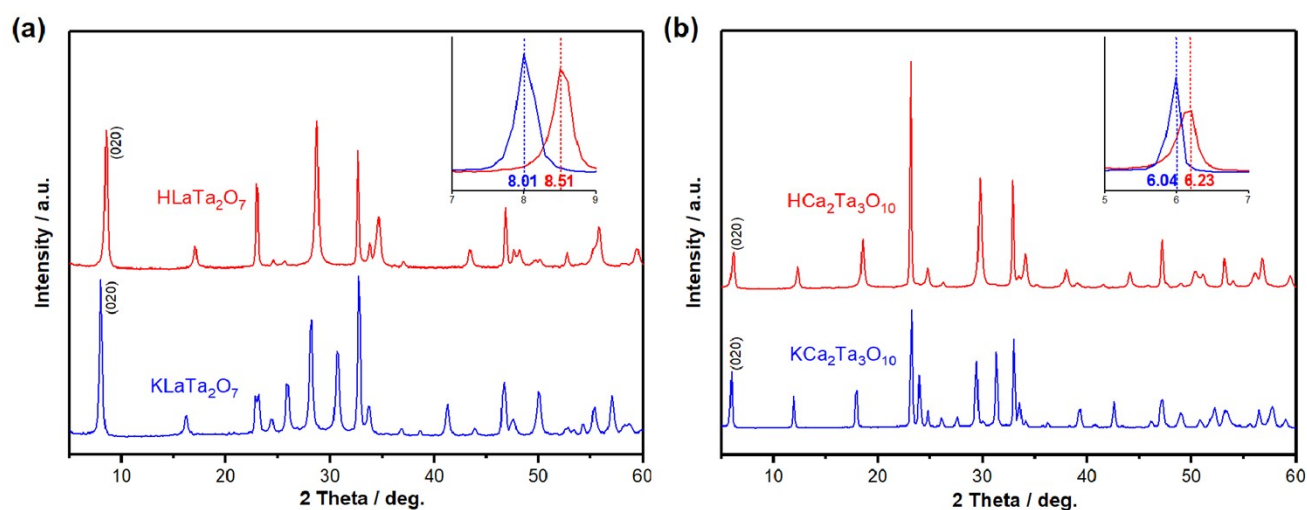

**Fig. S1** XRD patterns of (a) HLaTa<sub>2</sub>O<sub>7</sub> and (b) HCa<sub>2</sub>Ta<sub>3</sub>O<sub>10</sub> protonated perovskites. For comparison, XRD patterns of KLaTa<sub>2</sub>O<sub>7</sub> and KCa<sub>2</sub>Ta<sub>3</sub>O<sub>10</sub> were also given, and in brackets are given (hkl) Miller index.

**Table S2.** The hydrogen evolution yield and quantum efficiency of the samples.

| Samples                                          | H <sub>2</sub> evolution amount in 3 h (μmol) | Quantum efficiency (%) |
|--------------------------------------------------|-----------------------------------------------|------------------------|
| LaTaO <sub>4</sub>                               | 12.89                                         | 0.006                  |
| KLaTa <sub>2</sub> O <sub>7</sub>                | 506.97                                        | 0.26                   |
| KCa <sub>2</sub> Ta <sub>3</sub> O <sub>10</sub> | 298.62                                        | 0.15                   |

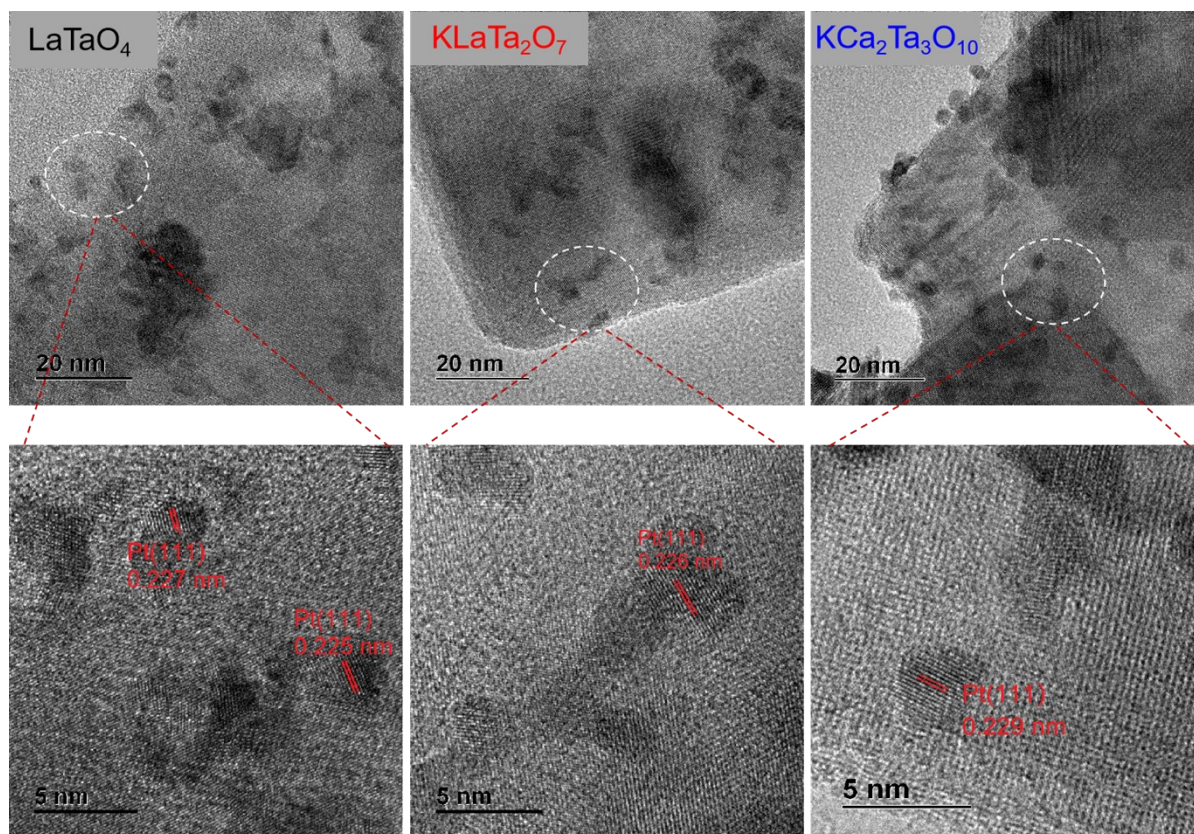

**Fig. S2** TEM images of Pt/LaTaO<sub>4</sub>, Pt/KLaTa<sub>2</sub>O<sub>7</sub>, and Pt/KCa<sub>2</sub>Ta<sub>3</sub>O<sub>10</sub> photocatalysts.

**Table S3.** Atomic percentage of Pt-loaded samples before and after H<sub>2</sub> evolution reaction was determined by SEM-EDS.

| Samples                                                    | Atomic percentage |          |       |
|------------------------------------------------------------|-------------------|----------|-------|
|                                                            | K                 | La or Ca | Ta    |
| Pt/KLaTa <sub>2</sub> O <sub>7</sub>                       | 10.83             | 9.78     | 22.75 |
| Pt/KLaTa <sub>2</sub> O <sub>7</sub> -after                | 2.57              | 11.15    | 20.79 |
| Pt/KCa <sub>2</sub> Ta <sub>3</sub> O <sub>10</sub>        | 6.13              | 13.84    | 22.56 |
| Pt/KCa <sub>2</sub> Ta <sub>3</sub> O <sub>10</sub> -after | 2.06              | 13.50    | 22.51 |

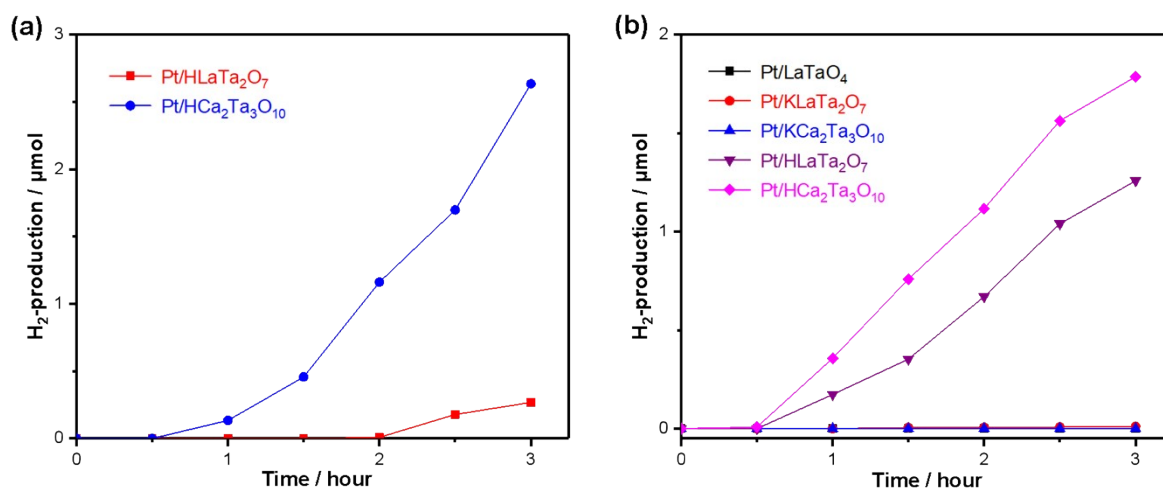**Fig. S3** (a) Time courses of photocatalytic H<sub>2</sub> evolution over Pt/HLaTa<sub>2</sub>O<sub>7</sub>, and Pt/HCa<sub>2</sub>Ta<sub>3</sub>O<sub>10</sub>. Reaction conditions: fresh catalyst, 50 mg; reaction solution, 20 vol % aqueous methanol solution (pH ≈ 2.5, 100 mL); light source, 300 W Xe lamp (λ ≥ 350 nm). (b) Time courses of H<sub>2</sub> evolution over Pt/LaTaO<sub>4</sub>, Pt/KLaTa<sub>2</sub>O<sub>7</sub>, Pt/KCa<sub>2</sub>Ta<sub>3</sub>O<sub>10</sub>, Pt/HLaTa<sub>2</sub>O<sub>7</sub>, and Pt/HCa<sub>2</sub>Ta<sub>3</sub>O<sub>10</sub>. Reaction conditions: catalyst, 50 mg; reaction solution, 5 mmol NaI solution (pH ≈ 2.5, 100 mL); light source, 300 W Xe lamp (λ ≥ 350 nm).

Supporting Information (SI)

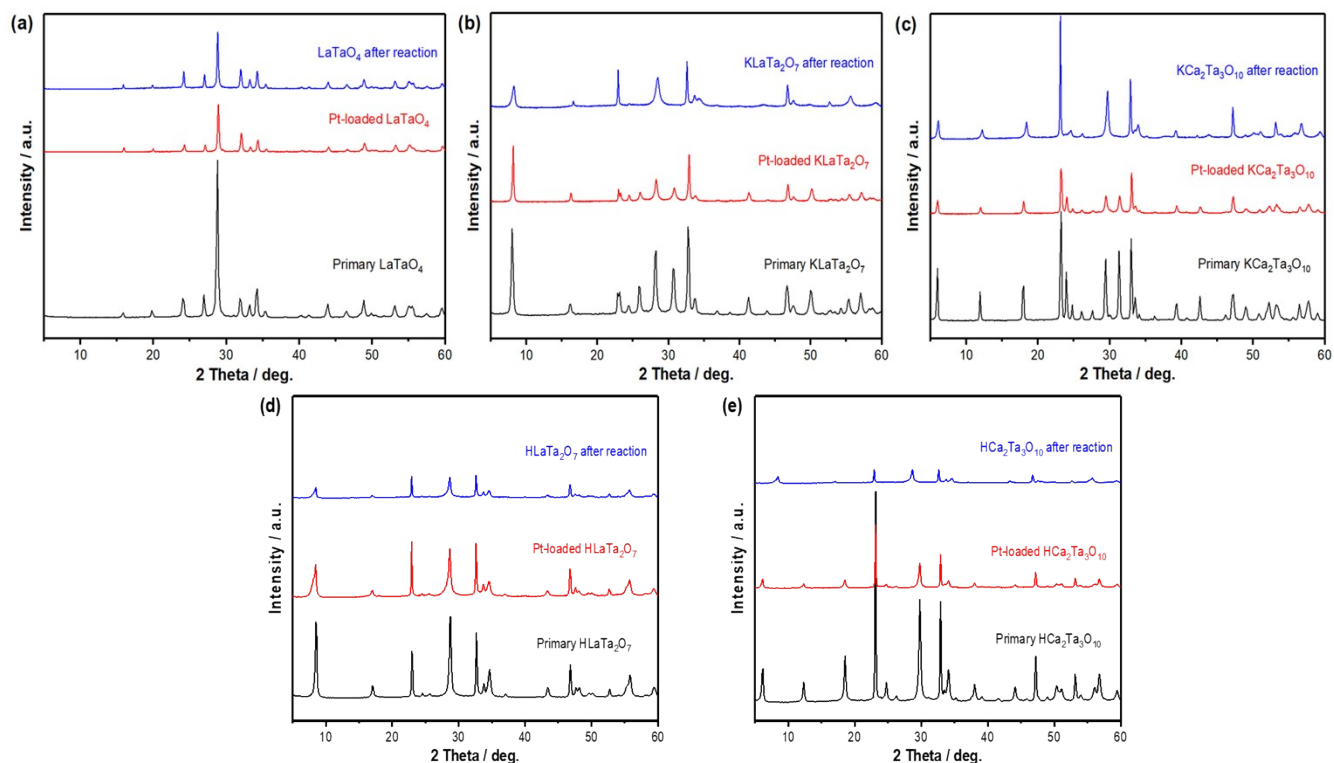

**Fig. S4** XRD patterns of the Pt-loaded samples, along with patterns of samples before and after H<sub>2</sub> evolution reactions in 20 vol % aqueous methanol solution. (a) LaTaO<sub>4</sub>, (b) KLaTa<sub>2</sub>O<sub>7</sub>, (c) KCa<sub>2</sub>Ta<sub>3</sub>O<sub>10</sub>, (d) HLaTa<sub>2</sub>O<sub>7</sub>, (e) HCa<sub>2</sub>Ta<sub>3</sub>O<sub>10</sub>.

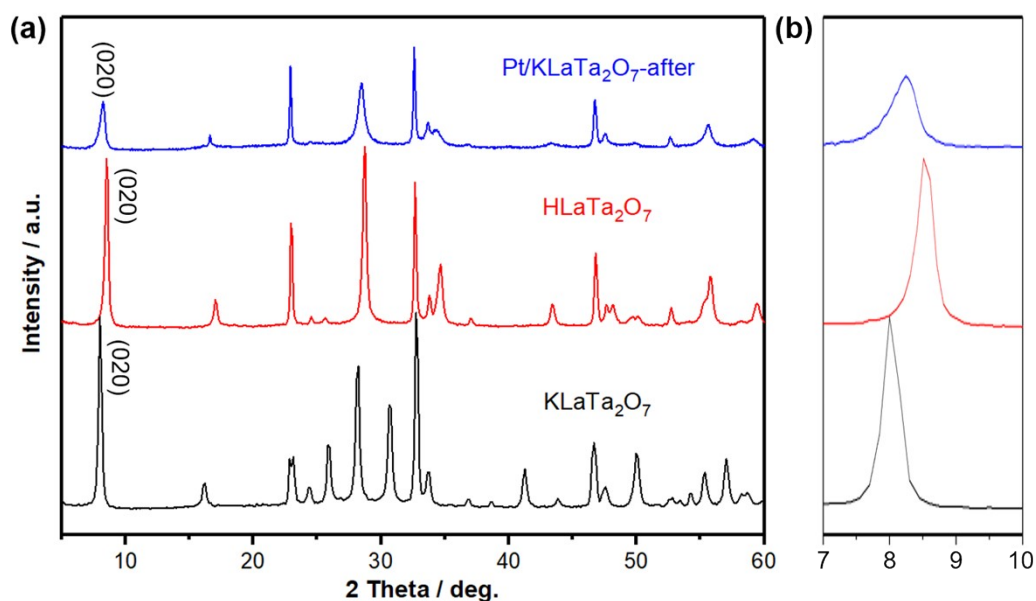

**Fig. S5** (a) XRD patterns of KLaTa<sub>2</sub>O<sub>7</sub>, HLaTa<sub>2</sub>O<sub>7</sub>, along with pattern of Pt/KLaTa<sub>2</sub>O<sub>7</sub> after H<sub>2</sub> evolution reaction in 20 vol % aqueous methanol solution (pH ≈ 2.5). (b) Enlarged XRD patterns at 2θ = 7-10°.

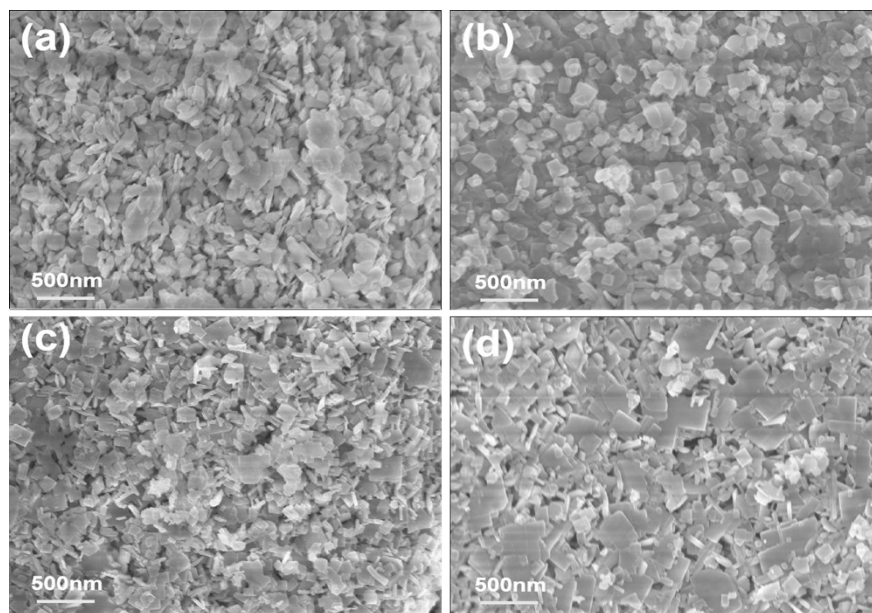

**Fig. S6** SEM images of (a) Pt/KLaTa<sub>2</sub>O<sub>7</sub>, (b) Pt/KLaTa<sub>2</sub>O<sub>7</sub> after H<sub>2</sub> evolution reaction, (c) Pt/KCa<sub>2</sub>Ta<sub>3</sub>O<sub>10</sub>, (d) Pt/KCa<sub>2</sub>Ta<sub>3</sub>O<sub>10</sub> after H<sub>2</sub> evolution reaction.

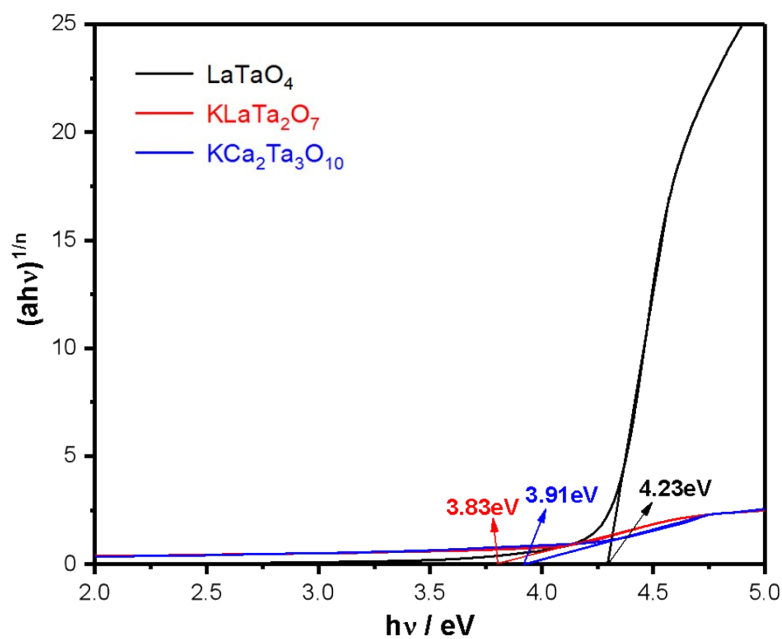

**Fig. S7** Tauc plot of direct-band gap semiconductor LaTaO<sub>4</sub> and indirect-band gap semiconductors KLaTa<sub>2</sub>O<sub>7</sub>, KCa<sub>2</sub>Ta<sub>3</sub>O<sub>10</sub>.

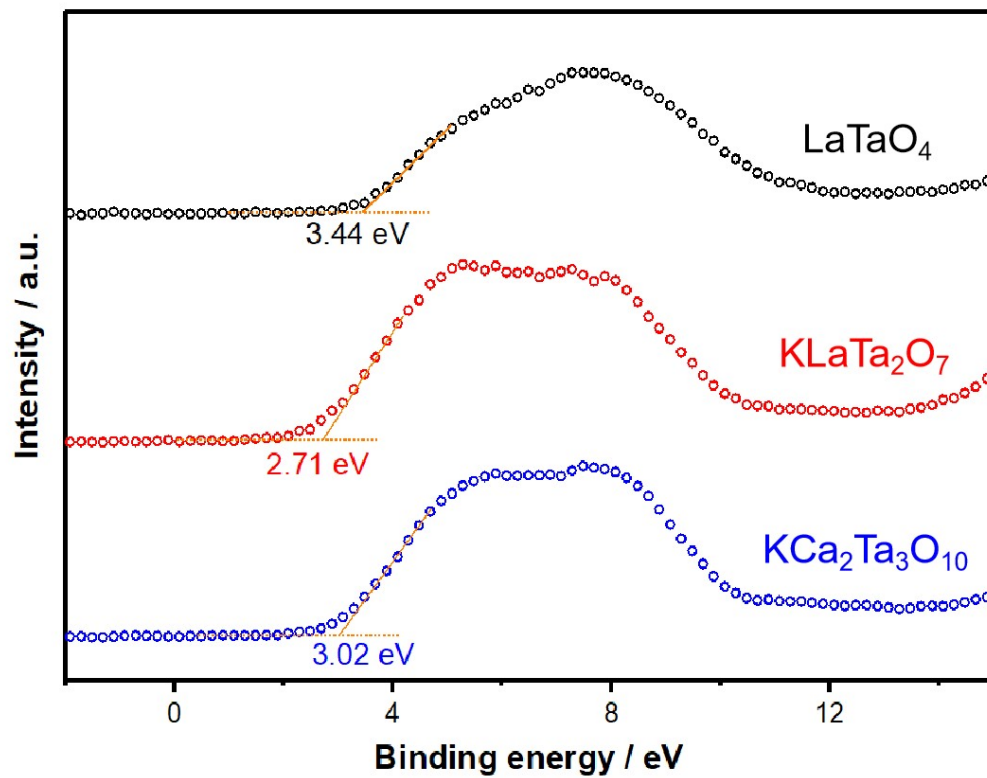

Fig. S8 VB-XPS spectra of LaTaO<sub>4</sub>, KLaTa<sub>2</sub>O<sub>7</sub>, and KCa<sub>2</sub>Ta<sub>3</sub>O<sub>10</sub>.
